# Supplementary material for: Dibenzothiophene-platinated complexes: probing the effect of ancillary ligands on the photophysical performance
Source: Royal Society of Chemistry journal article supplement (doi:10.1039/c7dt00349h), 2017-01-01
Supplement: c7dt00349h1.pdf [file c7dt00349h1.pdf]

## Supporting Information for

# Dibenzothiophene-platinated complexes: probing the effect of ancillary ligands on the photophysical performance

Anastasia I. Solomatina,<sup>a</sup> Irina O. Aleksandrova,<sup>b,c</sup> Antti J. Karttunen,<sup>c\*</sup> Sergey P. Tunik<sup>a</sup> and Igor O. Koshevoy<sup>b\*</sup>

<sup>a</sup> St.-Petersburg State University, 7/9 Universitetskaya nab., 199034 St. Petersburg, Russia

<sup>b</sup> University of Eastern Finland, Department of Chemistry, 80101, Joensuu, Finland

<sup>c</sup> Aalto University, Department of Chemistry, FI-00076 Aalto, Finland

E-mail: [antti.karttunen@aalto.fi](mailto:antti.karttunen@aalto.fi); [igor.koshevoy@uef.fi](mailto:igor.koshevoy@uef.fi)

**Synthesis** of HPyDBTO<sub>2</sub> ligand.

**Table S1.** Crystal data and structure refinement for **1–6**, **8–11**.

**Table S2.** Selected bond lengths (Å) and angles (deg.) for complexes **1–6** and **11**.

**Table S3.** Selected bond lengths (Å) and angles (deg.) for complexes **8–10**.

**Table S4.** UV-vis absorption spectra for complexes **1–11**.

**Figure S1.** Molecular views of complexes **1**, **3**, **4** and **6**.

**Figure S2.** Molecular views of complexes **10**.

**Figure S3.** 162 MHz <sup>31</sup>P{<sup>1</sup>H} NMR spectrum of **8**.

**Figure S4.** ESI-MS of complexes **8–10**.

**Figure S5.** Absorption spectra of complexes **1–7**, **10** and **11**.

**Figure S6.** Solid state excitation spectra of complexes **1**, **3–10**.

**Figure S7.** Solid state excitation and emission spectra of complexes **2** and **11**.

**Figures S8, S9.** Electron density difference plots for the lowest energy singlet excitation ( $S_0 \rightarrow S_1$ ) and the lowest energy triplet emission ( $T_1 \rightarrow S_0$ ) of the complexes **2–9** and **11**



### Synthesis of HPyDBTO<sub>2</sub>.

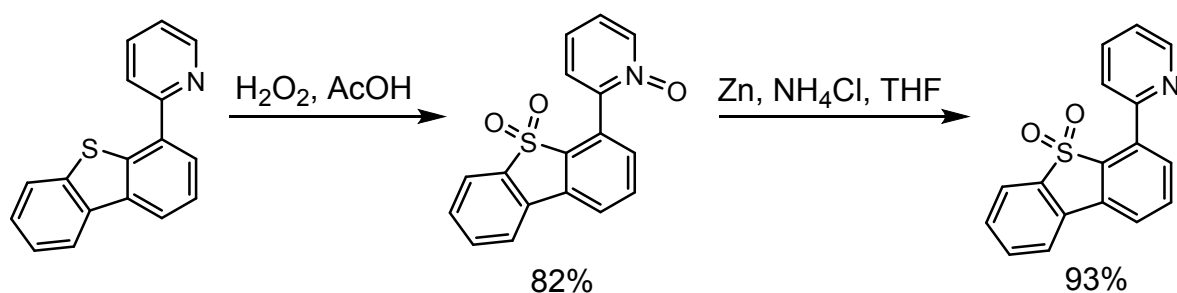

HPyDBT (0.4 g, 1.53 mmol) was dissolved in acetic acid (15 mL) and 30% water solution of H<sub>2</sub>O<sub>2</sub> (2.5 mL) was added. The reaction mixture was heated at 100 °C for 7 h under a nitrogen atmosphere. After cooling to room temperature the resulting dibenzothiophene-S,S-dioxide-pyridyl-N-oxide was precipitated with water (40 mL) as a white amorphous solid, which was washed with water (2 × 20 mL), dried on air (0.388 g, 82%) and used in the next step without additional purification. <sup>1</sup>H NMR (400 MHz, CDCl<sub>3</sub>, 298 K δ): 8.48 (d, <sup>3</sup>J<sub>HH</sub> 6.3 Hz, 1H), 7.91 – 7.89 (m, 2H), 7.86 (d, <sup>3</sup>J<sub>HH</sub> 7.6 Hz, 2H), 7.79 – 7.74 (m, 2H), 7.68 (t, <sup>3</sup>J<sub>HH</sub> 7.6 Hz, 1H), 7.55 (t, <sup>3</sup>J<sub>HH</sub> 7.6 Hz, 1H), 7.50 (t, <sup>3</sup>J<sub>HH</sub> 7.8 Hz, 1H), 7.44 (t, <sup>3</sup>J<sub>HH</sub> 6.4 Hz, 1H).

The sulfone N-oxide (0.37 g, 1.26 mmol) was dissolved in freshly distilled tetrahydrofuran (60 mL) and 30% water solution of NH<sub>4</sub>Cl (30 mL) was added, followed by Zn dust (0.255 g, 4.25 mmol). The reaction mixture was vigorously stirred under a nitrogen atmosphere for 1 h, the completion was checked by the TLC test (eluent CH<sub>2</sub>Cl<sub>2</sub>/methanol 100:1 v/v mixture). The organic layer was separated, the aqueous one was washed with CH<sub>2</sub>Cl<sub>2</sub> (2 × 15 mL). The organic fractions were combined, dried over anhydrous Na<sub>2</sub>SO<sub>4</sub>, filtered and evaporated. Pale oily residue was treated with diethyl ether (10 mL) to afford colourless HPyDBTO<sub>2</sub> (0.33 g, 93%). <sup>1</sup>H NMR (400 MHz, CDCl<sub>3</sub>, 298 K, δ): 8.91 (d, <sup>3</sup>J<sub>HH</sub> 4.6 Hz, 1H), 8.20 (d, <sup>3</sup>J<sub>HH</sub> 7.9 Hz, 1H), 7.98 – 7.92 (m, 2H), 7.89 – 7.81 (m, 3H), 7.76 (t, <sup>3</sup>J<sub>HH</sub> 7.7 Hz, 1H), 7.66 (td, <sup>3</sup>J<sub>HH</sub> 7.6, <sup>4</sup>J<sub>HH</sub> 1.1 Hz, 1H), 7.55 (td, <sup>3</sup>J<sub>HH</sub> 7.5, <sup>4</sup>J<sub>HH</sub> 0.8 Hz, 1H), 7.45 (dd, <sup>3</sup>J<sub>HH</sub> 7.2, 5.3 Hz, 1H). Anal. calc. for C<sub>17</sub>H<sub>11</sub>NO<sub>2</sub>S (%): C 69.61; H 3.78; N 4.78; S 10.93. Found: C 69.94; H 3.61; N 4.56; S 11.12.

**Table S1.** Crystal data and structure refinement for **1–6, 8–11.**

| Identification code                    | 1                                                    | 2                                                    | 3                                                     | 4                                                      | 5                                                                                                               |
|----------------------------------------|------------------------------------------------------|------------------------------------------------------|-------------------------------------------------------|--------------------------------------------------------|-----------------------------------------------------------------------------------------------------------------|
| Empirical formula                      | C <sub>19</sub> H <sub>16</sub> ClNOPtS <sub>2</sub> | C <sub>36</sub> H <sub>27</sub> Cl <sub>3</sub> NPtS | C <sub>38</sub> H <sub>22</sub> ClF <sub>9</sub> NPtS | C <sub>38</sub> H <sub>31</sub> ClNO <sub>3</sub> PPtS | C <sub>145</sub> H <sub>112</sub> C <sub>16</sub> N <sub>8</sub> OP <sub>2</sub> Pt <sub>2</sub> S <sub>2</sub> |
| Formula weight                         | 568.99                                               | 838.05                                               | 957.13                                                | 843.21                                                 | 2711.36                                                                                                         |
| Temperature (K)                        |                                                      |                                                      | 150(2)                                                |                                                        | 120(2)                                                                                                          |
| Wavelength (Å)                         |                                                      |                                                      | 0.71073                                               |                                                        |                                                                                                                 |
| Crystal system                         | Monoclinic                                           | Monoclinic                                           | Orthorhombic                                          | Orthorhombic                                           | Triclinic                                                                                                       |
| Space group                            | <i>P2<sub>1</sub>/c</i>                              | <i>P2<sub>1</sub>/c</i>                              | <i>Pbca</i>                                           | <i>Pbca</i>                                            | <i>P 1</i>                                                                                                      |
| Unit cell dimensions                   |                                                      |                                                      |                                                       |                                                        |                                                                                                                 |
| a (Å)                                  | 14.1551(3)                                           | 19.685(3)                                            | 15.7792(3)                                            | 14.9248(19)                                            | 14.3412(5)                                                                                                      |
| b (Å)                                  | 12.8383(3)                                           | 9.0677(13)                                           | 24.0043(5)                                            | 19.983(3)                                              | 14.7639(5)                                                                                                      |
| c (Å)                                  | 10.3284(2)                                           | 18.272(3)                                            | 39.2309(9)                                            | 21.437(3)                                              | 16.5461(6)                                                                                                      |
| a (°)                                  | 90                                                   | 90                                                   | 90                                                    | 90                                                     | 65.2770(10)                                                                                                     |
| β (°)                                  | 110.2640(10) <sup>o</sup>                            | 111.318(4)                                           | 90                                                    | 90                                                     | 69.1760(10)                                                                                                     |
| γ (°)                                  | 90                                                   | 90                                                   | 90                                                    | 90                                                     | 82.2040(10)                                                                                                     |
| Volume (Å <sup>3</sup> )               | 1760.78(7)                                           | 3038.4(8)                                            | 14859.4(5)                                            | 6393.3(14)                                             | 2974.00(18)                                                                                                     |
| Z                                      | 4                                                    | 4                                                    | 16                                                    | 8                                                      | 1                                                                                                               |
| ρ <sub>calc</sub> (Mg/m <sup>3</sup> ) | 2.146                                                | 1.832                                                | 1.711                                                 | 1.752                                                  | 1.514                                                                                                           |
| μ (mm <sup>-1</sup> )                  | 8.365                                                | 5.032                                                | 4.022                                                 | 4.629                                                  | 2.605                                                                                                           |
| F(000)                                 | 1088                                                 | 1640                                                 | 7424                                                  | 3328                                                   | 1366                                                                                                            |
| Crystal size (mm <sup>3</sup> )        | 0.110 × 0.081 × 0.071                                | 0.180 × 0.089 × 0.014                                | 0.618 × 0.219 × 0.196                                 | 0.444 × 0.419 × 0.390                                  | 0.765 x 0.263 x 0.238                                                                                           |
| θ range for data collection (°)        | 2.207 to 31.998                                      | 1.110 to 26.999                                      | 1.629 to 30.014                                       | 1.900 to 30.030                                        | 1.436 to 25.999                                                                                                 |
| Index ranges                           | -21 ≤ h ≤ 21, -<br>19 ≤ k ≤ 19, -                    | -25 ≤ h ≤ 25, -<br>11 ≤ k ≤ 11, -                    | -21 ≤ h ≤ 21, -<br>33 ≤ k ≤ 30, -                     | -20 ≤ h ≤ 20, -<br>28 ≤ k ≤ 28, -                      | -17 ≤ h ≤ 17, -<br>18 ≤ k ≤ 18, -20 ≤ l ≤ 20                                                                    |

|                                                  | 15<=l<=15                 | 23<=l<=23                 | 55<=l<=25                 | 30<=l<=30                 |                           |
|--------------------------------------------------|---------------------------|---------------------------|---------------------------|---------------------------|---------------------------|
| Reflections collected                            | 64015                     | 40002                     | 97349                     | 141752                    | 79921                     |
| Independent reflections                          | 6099 [R(int) = 0.0258]    | 6571 [R(int) = 0.0761]    | 21577 [R(int) = 0.0511]   | 9328 [R(int) = 0.0244]    | 11686 [R(int) = 0.0323]   |
| Completeness to $\theta=25.24^\circ$             | 99.8 %                    | 99.0                      | 99.9                      | 99.9                      | 99.9                      |
| Absorption correction                            | Numerical                 | Numerical                 | Multi-scan                | Numerical                 | Numerical                 |
| Max. and min. transmission                       | 0.552 and 0.448           | 0.932 and 0.590           | 0.455 and 0.361           | 0.164 and 0.147           | 0.538 and 0.444           |
| Data/restraints/parameters                       | 6099 / 0 / 226            | 6571 / 0 / 388            | 21577 / 60 / 965          | 9328 / 0 / 418            | 11686 / 12 / 753          |
| GOOF on F <sup>2</sup>                           | 1.099                     | 1.058                     | 1.015                     | 1.086                     | 1.068                     |
| Final R indices [I>2 $\sigma$ (I)] <sup>a</sup>  | R1 = 0.0157, wR2 = 0.0296 | R1 = 0.0388, wR2 = 0.0769 | R1 = 0.0318, wR2 = 0.0581 | R1 = 0.0184, wR2 = 0.0430 | R1 = 0.0322, wR2 = 0.0853 |
| R indices (all data)                             | R1 = 0.0182, wR2 = 0.0301 | R1 = 0.0530, wR2 = 0.0807 | R1 = 0.0527, wR2 = 0.0630 | R1 = 0.0234, wR2 = 0.0455 | R1 = 0.0367, wR2 = 0.0884 |
| Largest diff. peak and hole (e.Å <sup>-3</sup> ) | 0.799 and -0.956          | 1.373 and -2.382          | 1.063 and -0.852          | 0.760 and -0.421          | 2.689 and -1.140          |

$$^a R_1 = \frac{\sum ||F_o| - |F_c||}{\sum |F_o|}; wR2 = \frac{[\sum [w(F_o^2 - F_c^2)^2]}{\sum [w(F_o^2)^2]}]^{1/2}$$

**Table S1.** Continued.

| Identification code | 6                                                                  | 8                                                                    | 9                                                                   | 10                                                                   | 11                                                                  |
|---------------------|--------------------------------------------------------------------|----------------------------------------------------------------------|---------------------------------------------------------------------|----------------------------------------------------------------------|---------------------------------------------------------------------|
| Empirical formula   | C <sub>24</sub> H <sub>24</sub> Cl <sub>3</sub> N <sub>4</sub> PtS | C <sub>79</sub> H <sub>46</sub> BF <sub>24</sub> NP <sub>2</sub> PtS | C <sub>59</sub> H <sub>30</sub> BF <sub>24</sub> N <sub>3</sub> PtS | C <sub>61</sub> H <sub>30</sub> BF <sub>24</sub> N <sub>3</sub> Pt S | C <sub>36</sub> H <sub>27</sub> Cl <sub>3</sub> NO <sub>2</sub> PtS |
| Formula weight      | 732.94                                                             | 1765.07                                                              | 1474.82                                                             | 1498.84                                                              | 870.05                                                              |
| Temperature (K)     | 120(2)                                                             | 150(2)                                                               | 120(2)                                                              | 120(2)                                                               | 150(2)                                                              |
| Wavelength (Å)      |                                                                    |                                                                      | 0.71073                                                             |                                                                      |                                                                     |
| Crystal system      | Orthorhombic                                                       | Monoclinic                                                           | Monoclinic                                                          | Triclinic                                                            | Triclinic                                                           |

| Space group                            | <i>Fdd2</i>                                | <i>P2<sub>1</sub>/n</i>                      | <i>P2<sub>1</sub>/n</i>                      | <i>P 1</i>                                   | <i>P 1</i>                                   |
|----------------------------------------|--------------------------------------------|----------------------------------------------|----------------------------------------------|----------------------------------------------|----------------------------------------------|
| Unit cell dimensions                   |                                            |                                              |                                              |                                              |                                              |
| a (Å)                                  | 22.8514(7)                                 | 10.4003(8)                                   | 18.0471(4)                                   | 9.7875(7)                                    | 9.0984(5)                                    |
| b (Å)                                  | 72.360(2)                                  | 36.096(3)                                    | 9.7853(2)                                    | 16.9299(12)                                  | 12.7450(8)                                   |
| c (Å)                                  | 5.8722(2)                                  | 19.1737(15)                                  | 31.2267(7)                                   | 18.1399(12)                                  | 14.8158(9)                                   |
| α (°)                                  | 90                                         | 90                                           | 90                                           | 109.001(2)                                   | 73.077(2)                                    |
| β (°)                                  | 90                                         | 90.873                                       | 104.7500(10)                                 | 91.579(2)                                    | 86.803(2)                                    |
| γ (°)                                  | 90                                         | 90                                           | 90                                           | 106.545(2)                                   | 84.281(2)                                    |
| Volume (Å <sup>3</sup> )               | 9709.9(5)                                  | 7197.2(10)                                   | 5332.8(2)                                    | 2700.3(3)                                    | 1634.80(17)                                  |
| Z                                      | 16                                         | 4                                            | 4                                            | 2                                            | 2                                            |
| ρ <sub>calc</sub> (Mg/m <sup>3</sup> ) | 2.006                                      | 1.629                                        | 1.837                                        | 1.843                                        | 1.768                                        |
| μ (mm <sup>-1</sup> )                  | 6.286                                      | 2.131                                        | 2.800                                        | 2.767                                        | 4.685                                        |
| F(000)                                 | 5696                                       | 3488                                         | 2880                                         | 1464                                         | 852                                          |
| Crystal size (mm <sup>3</sup> )        | 0.146 × 0.063 × 0.034                      | 0.703 × 0.352 × 0.110                        | 0.646 × 0.551 × 0.152                        | 0.142 × 0.052 × 0.047                        | 0.971 × 0.182 × 0.126                        |
| θ range for data collection (°)        | 1.869 to 26.995                            | 1.203 to 30.000                              | 1.349 to 28.999                              | 2.084 to 26.000                              | 2.503 to 38.267                              |
| Index ranges                           | -28 ≤ h ≤ 28, -<br>92 ≤ k ≤ 88, -7 ≤ l ≤ 7 | -14 ≤ h ≤ 14, -<br>50 ≤ k ≤ 50, -26 ≤ l ≤ 26 | -24 ≤ h ≤ 24, -<br>13 ≤ k ≤ 13, -42 ≤ l ≤ 42 | -12 ≤ h ≤ 12, -<br>20 ≤ k ≤ 20, -22 ≤ l ≤ 22 | -15 ≤ h ≤ 15, -<br>22 ≤ k ≤ 21, -24 ≤ l ≤ 25 |
| Reflections collected                  | 36977                                      | 195720                                       | 194827                                       | 84786                                        | 47425                                        |
| Independent reflections                | 5312 [R(int) = 0.0600]                     | 20988 [R(int) = 0.0430]                      | 14180 [R(int) = 0.0389]                      | 10116 [R(int) = 0.0669]                      | 16973 [R(int) = 0.0208]                      |
| Completeness to θ = 25.24°             | 100.0                                      | 99.9                                         | 99.9                                         | 96.9                                         | 98.7                                         |
| Absorption correction                  | Numerical                                  | Multi-scan                                   | Numerical                                    | Multi-scan                                   | Numerical                                    |
| Max. and min. transmission             | 0.808 and 0.628                            | 0.791 and 0.423                              | 0.653 and 0.179                              | 0.878 and 0.841                              | 0.554 and 0.374                              |

|                                                                                                                                                                                                                                     |            |                              |                              |                              |                              |                              |
|-------------------------------------------------------------------------------------------------------------------------------------------------------------------------------------------------------------------------------------|------------|------------------------------|------------------------------|------------------------------|------------------------------|------------------------------|
| Data/<br>parameters                                                                                                                                                                                                                 | restrains/ | 5312 / 1 / 308               | 20988 / 117 / 1066           | 14180 / 278 / 948            | 10116 / 42 / 848             | 16973 / 0 / 406              |
| GOOF on F <sup>2</sup>                                                                                                                                                                                                              |            | 1.055                        | 1.087                        | 1.080                        | 1.067                        | 1.035                        |
| Final R<br>[I>2σ(I)] <sup>a</sup>                                                                                                                                                                                                   | indices    | R1 = 0.0256, wR2 =<br>0.0442 | R1 = 0.0337, wR2 =<br>0.0645 | R1 = 0.0267, wR2 =<br>0.0552 | R1 = 0.0489, wR2 =<br>0.0731 | R1 = 0.0196, wR2 =<br>0.0444 |
| R indices (all data)                                                                                                                                                                                                                |            | R1 = 0.0321, wR2 =<br>0.0453 | R1 = 0.0422, wR2 =<br>0.0671 | R1 = 0.0322, wR2 =<br>0.0573 | R1 = 0.0613, wR2 =<br>0.0761 | R1 = 0.0242, wR2 =<br>0.0462 |
| Largest diff. peak and<br>hole (e.Å <sup>-3</sup> )                                                                                                                                                                                 |            | 0.935 and -1.237             | 0.957 and -1.414             | 1.051 and -0.750             | 2.501 and -1.045             | 1.693 and -1.915             |
| <sup>a</sup> R <sub>1</sub> = Σ  F <sub>o</sub>   -  F <sub>c</sub>   /Σ F <sub>o</sub>  ; wR <sub>2</sub> = [Σ [w(F <sub>o</sub> <sup>2</sup> - F <sub>c</sub> <sup>2</sup> )]/ Σ[w(F <sub>o</sub> <sup>2</sup> )]] <sup>1/2</sup> |            |                              |                              |                              |                              |                              |

---

**Table S2.** Selected bond lengths (Å) and angles (deg.) for complexes **1–6** and **11**.

|                  | <b>1</b>  | <b>2</b> | <b>3</b>                | <b>4</b>  | <b>5</b>  | <b>6</b> | <b>11</b> |
|------------------|-----------|----------|-------------------------|-----------|-----------|----------|-----------|
| Bond lengths, Å  |           |          |                         |           |           |          |           |
| C(1)-Pt(1)       | 2.006(2)  | 1.994(5) | 2.011(3)/<br>2.018(3)   | 2.008(2)  | 1.994(5)  | 2.001(6) | 1.996(1)  |
| N(1)-Pt(1)       | 2.051(1)  | 2.083(5) | 2.075(2)/<br>2.077(2)   | 2.084(2)  | 2.078(3)  | 2.096(5) | 2.080(1)  |
| P(1)-Pt(1)       | 2.2202(4) | 2.232(2) | 2.222(1)/<br>2.230(1)   | 2.2429(6) | 2.238(1)  | 2.219(2) | 2.2432(5) |
| Cl(1)-Pt(1)      | 2.4090(5) | 2.365(1) | 2.3852(9)/<br>2.384(1)  | 2.3734(7) | 2.393(1)  | 2.404(2) | 2.3763(3) |
| Bond angles, °   |           |          |                         |           |           |          |           |
| N(1)-Pt(1)-Cl(1) | 92.97(4)  | 93.1(1)  | 93.00(7)/<br>91.97(7)   | 92.43(5)  | 92.99(9)  | 92.9(1)  | 92.27(3)  |
| C(1)-Pt(1)-P(1)  | 99.63(5)  | 96.6(2)  | 95.67(9)/<br>97.33(9)   | 96.26(6)  | 99.0(1)   | 98.0(2)  | 96.80(4)  |
| C(1)-Pt(1)-Cl(1) | 171.79(5) | 172.5(2) | 171.06(9)/<br>170.89(9) | 169.32(6) | 170.0(1)  | 167.3(2) | 172.00(4) |
| N(1)-Pt(1)-P(1)  | 174.02(5) | 172.5(1) | 175.26(8)/<br>172.43(7) | 170.58(5) | 171.99(9) | 164.4(1) | 175.55(3) |

**Table S3.** Selected bond lengths (Å) and angles (deg.) for complexes **8–10**.

|                      | <b>8</b>  | <b>9</b>  | <b>10</b> |
|----------------------|-----------|-----------|-----------|
| Bond lengths, Å      |           |           |           |
| C(1)-Pt(1)           | 2.064(2)  | 2.002(2)  | 1.998(5)  |
| N(1)-Pt(1)           | 2.096(2)  | 2.016(2)  | 2.013(4)  |
| N(2)-Pt(1)           | -         | 2.032(2)  | 2.044(4)  |
| N(3)-Pt(1)           | -         | 2.115(2)  | 2.130(4)  |
| P(1)-Pt(1)           | 2.3288(8) | -         | -         |
| P(2)-Pt(1)           | 2.2531(8) | -         | -         |
| Bond angles, °       |           |           |           |
| C(1)-Pt(1)-N(1)      | 79.46(8)  | 79.80(9)  | 79.97(17) |
| P(1)-Pt(1)-P(2)      | 81.26(2)  | -         | -         |
| N(2)-Pt(1)-N(3)      | -         | 77.40(8)  | 78.40(15) |
| N(1)-Pt(1)-N(3)/P(1) | 99.22(6)  | 101.08(8) | 100.4(1)  |
| C(1)-Pt(1)-N(3)/P(1) | 177.51(7) | 178.46(8) | 178.3(2)  |
| N(1)-Pt(1)-N(2)/P(2) | 178.87(6) | 177.85(8) | 178.8(1)  |



**Table S4.** UV-vis absorption spectra for complexes **1–11**<sup>a</sup>.

|           | $\lambda_{\text{abs}}$ , nm, ( $\epsilon \times 10^{-3}$ , M <sup>-1</sup> cm <sup>-1</sup> ) |
|-----------|-----------------------------------------------------------------------------------------------|
| <b>1</b>  | 285sh (29), 293sh (25), 305 (24), 354sh (5.9), 367 (8.6), 390sh (4.6), 405sh (3.2)            |
| <b>2</b>  | 295 (23), 305 (24), 349sh (3.8), 365 (5.5), 396 (3.2), 410sh (2.9)                            |
| <b>3</b>  | 278sh (28), 287sh (25), 294 (25), 305 (26), 353sh (4.6), 367 (6.6), 395sh (4.0), 410sh (3.4)  |
| <b>4</b>  | 285sh (29), 295 (28), 305 (30), 351sh (5.1), 365 (6.9), 398 (4.0), 410sh (3.6)                |
| <b>5</b>  | 297sh (71), 305 (76), 326sh (64), 399 (4.8), 414sh (4.3)                                      |
| <b>6</b>  | 270sh (27), 294 (24), 305 (27), 352sh (6.3), 363.5 (7.1), 395 (3.4), 410sh (3.0)              |
| <b>7</b>  | 265 (54), 285sh (34), 295sh (29), 307 (33), 370 (9.8), 395sh (5.1), 414sh (3.9)               |
| <b>8</b>  | 270 (58), 298 (25), 307 (29), 385 (11)                                                        |
| <b>9</b>  | 239sh (58), 269 (51), 301 (31), 375 (9.7), 390sh (9.1), 440sh (4.1)                           |
| <b>10</b> | 272 (65), 298sh (29), 332sh (8.4), 372 (9.7), 395sh (8.0), 440sh (3.3)                        |
| <b>11</b> | 269sh (20), 290sh (20), 297 (23), 307 (24), 349sh (6.9), 362 (9.6), 405 (2.1), 415sh (2.0)    |

<sup>a</sup> Complexes **1–6** and **11** were measured in DMSO, **7–10** in CH<sub>2</sub>Cl<sub>2</sub>

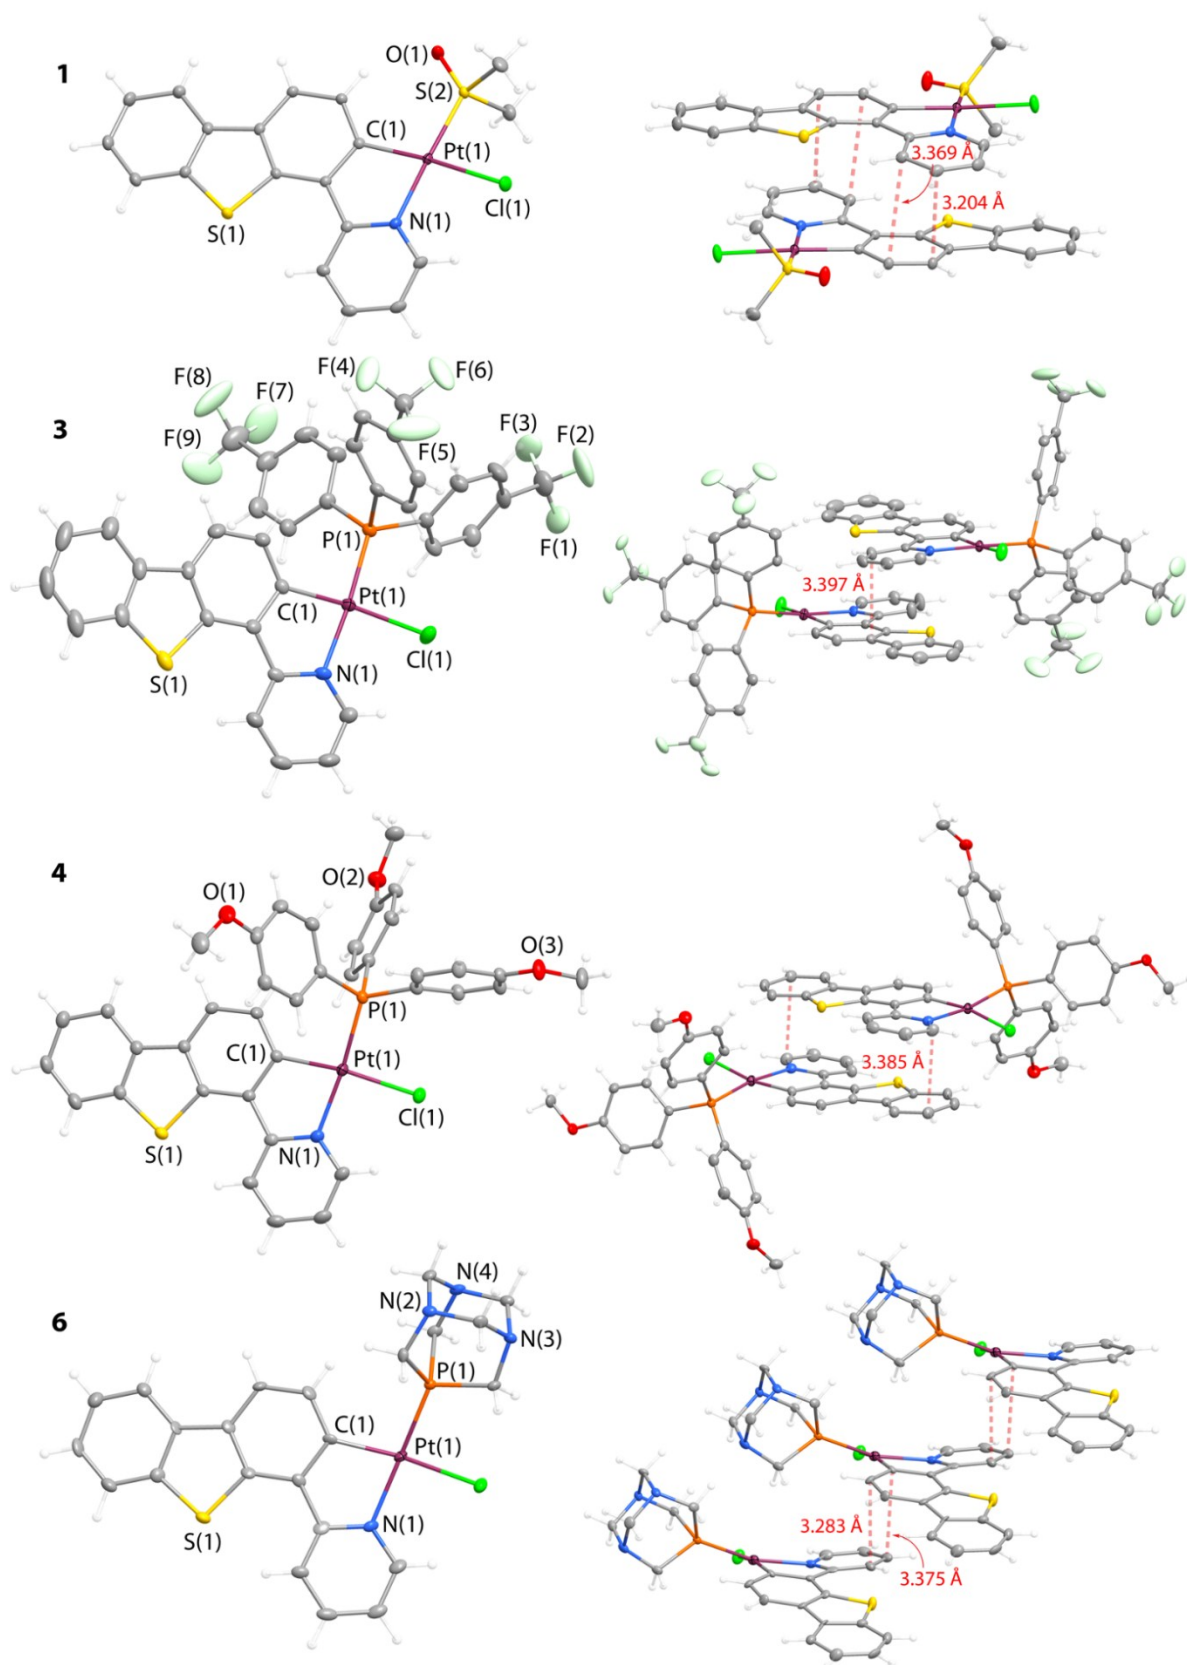

**Figure S1.** Molecular views of complexes **1**, **3**, **4** and **6**. One of two independent molecules found in the unit cell of **3** is presented. Thermal ellipsoids are shown at the 50% probability level.

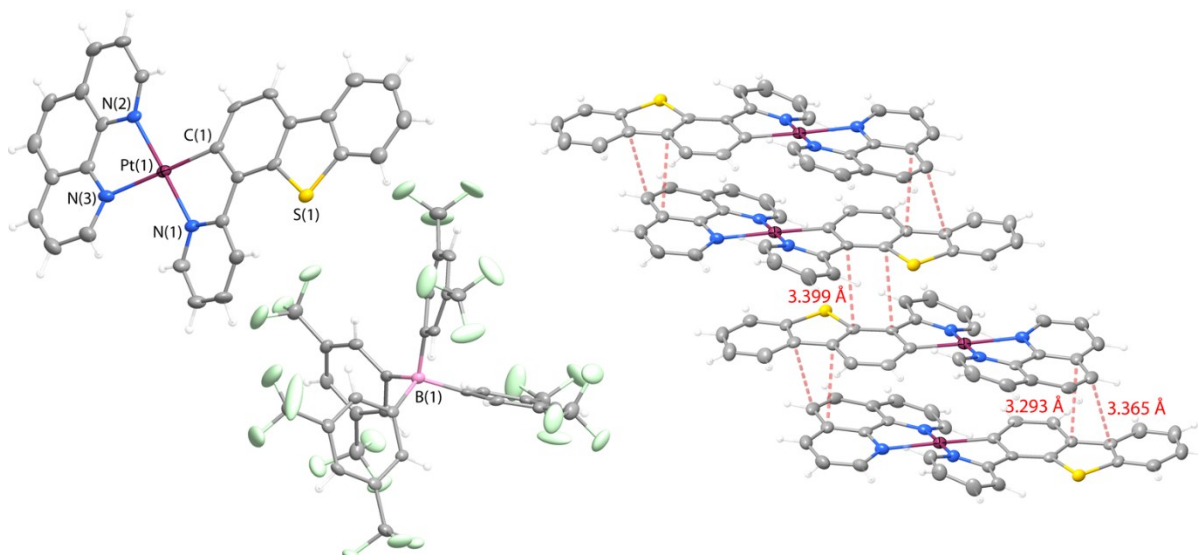

**Figure S2.** Molecular view of complex **10**. Thermal ellipsoids are shown at the 50% probability level.

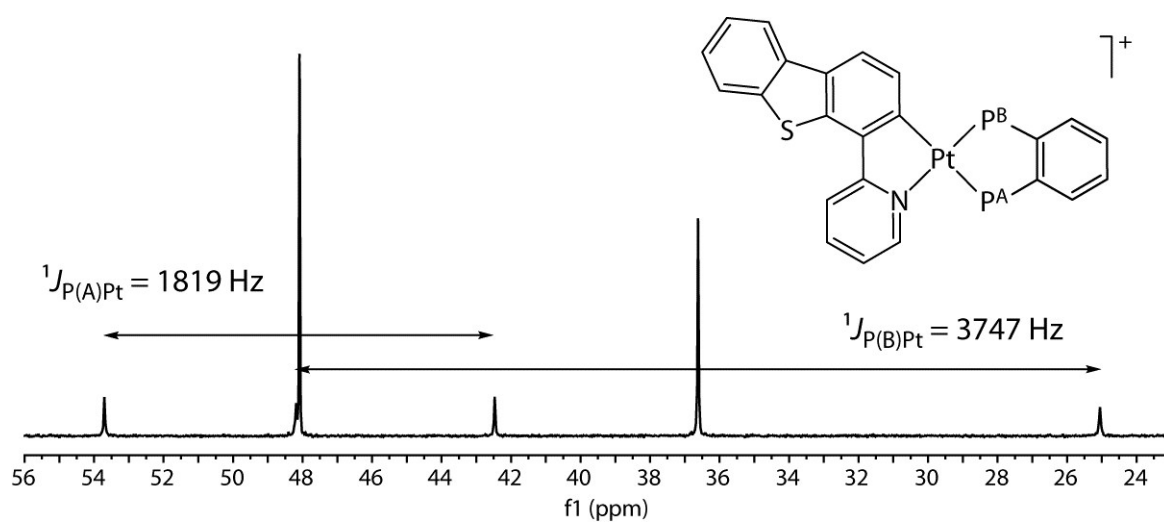

**Figure S3.** 162 MHz  $^{31}\text{P}\{^1\text{H}\}$  NMR spectrum of **8** ( $\text{CD}_2\text{Cl}_2$ , 298 K).

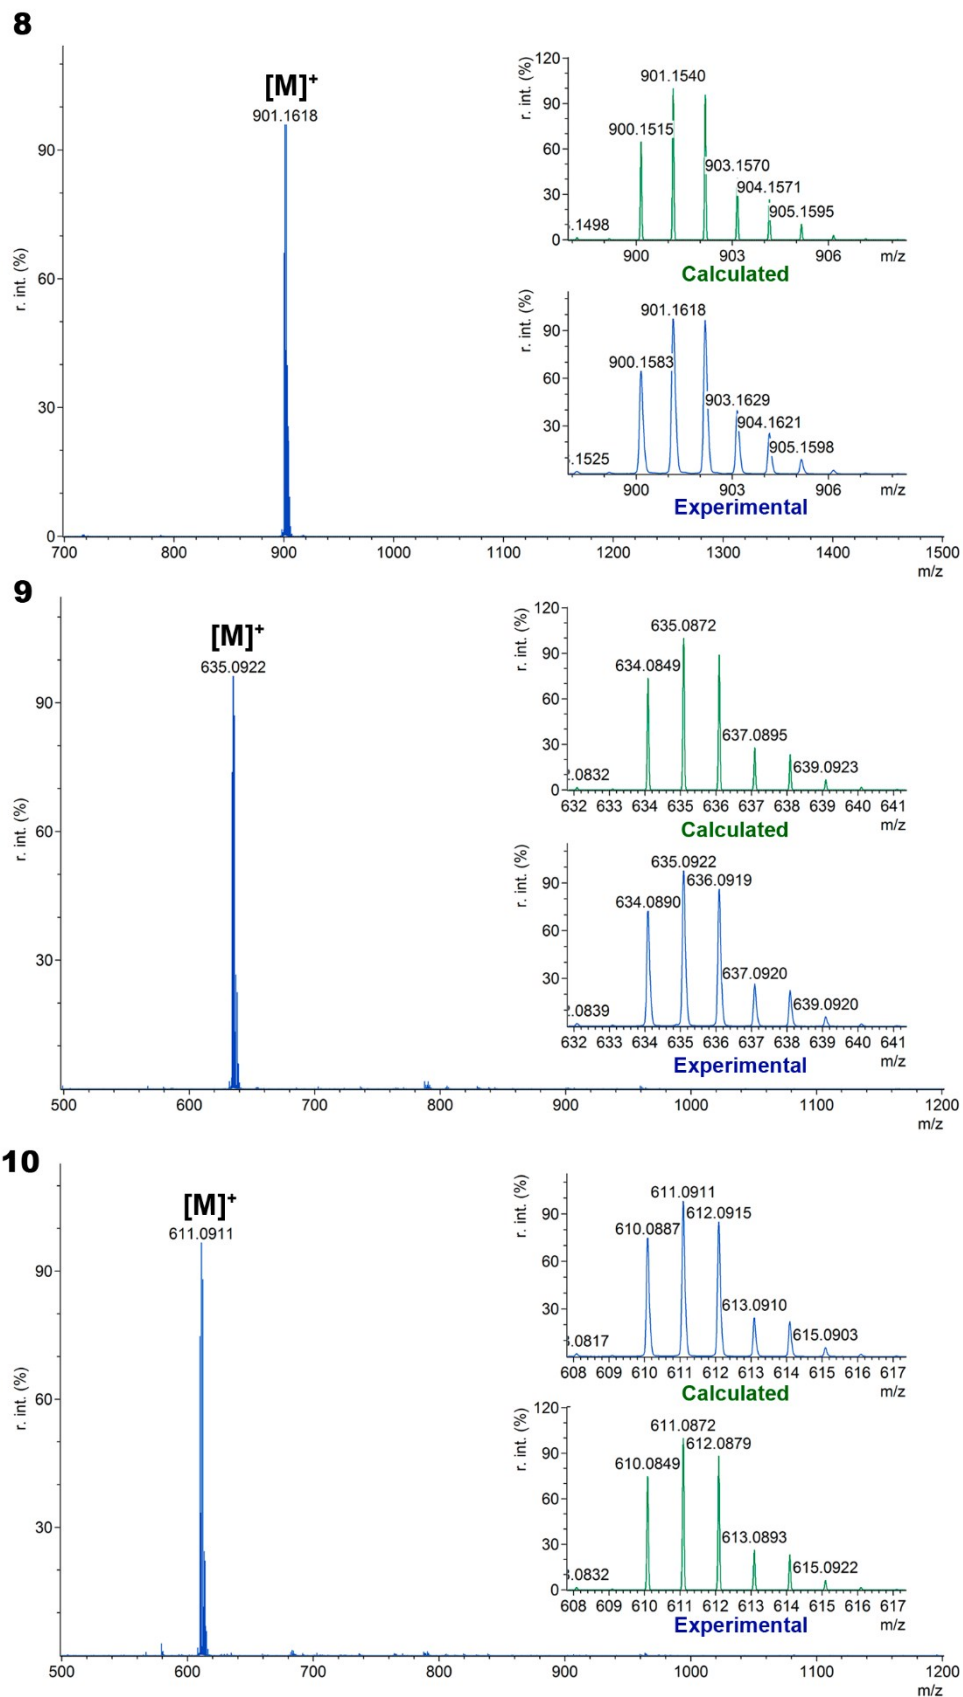

Figure S4. ESI-MS of complexes 8–10.

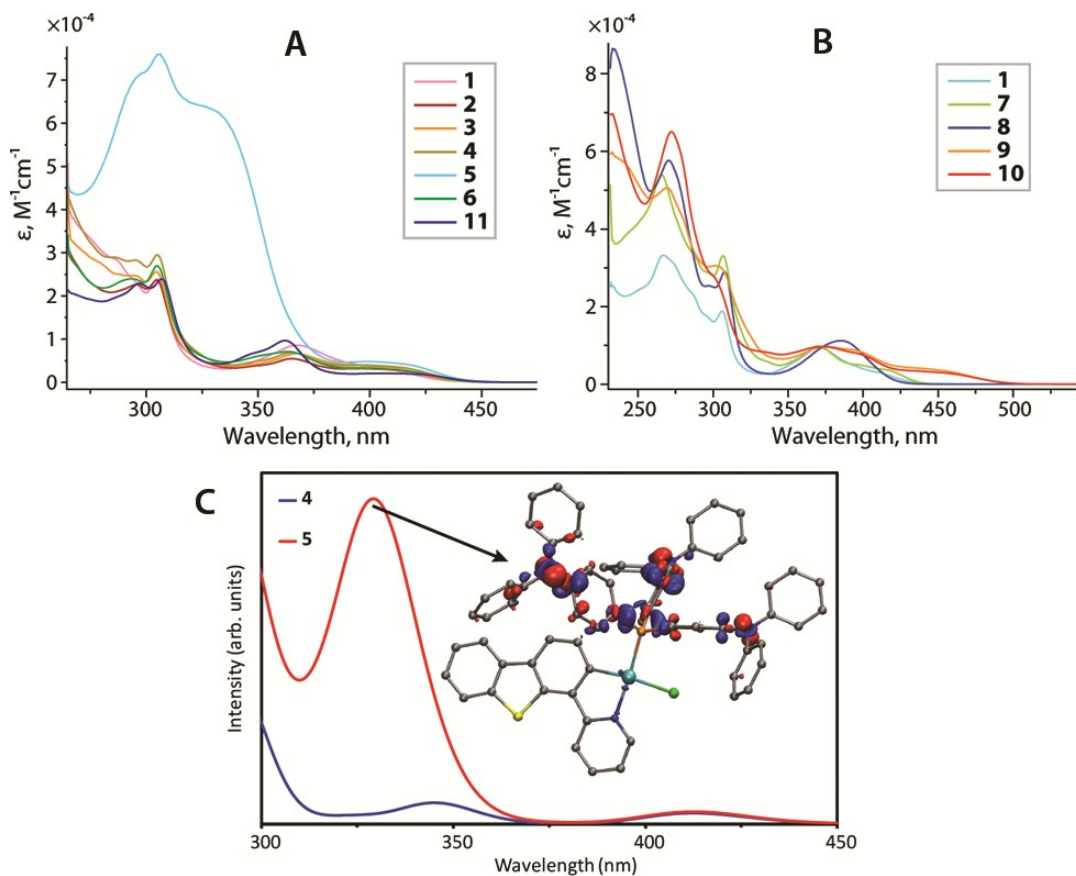

**Figure S5.** Absorption spectra of complexes 1–6 and 11 in DMSO (A); of 1, 7–10 in  $CH_2Cl_2$  (B); TDDFT-PBE0 vertical excitation spectra for the complexes 4 and 5 (C), the inset shows electron density difference plot for the  $S_0 \rightarrow S_{10}$  singlet excitation of complex 5 (328 nm; oscillator strength 0.53 a.u.; plot isovalue 0.002 a.u.). During the electronic transition, the electron density increases in the blue areas and decreases in the red areas. The raw vertical excitations have been convoluted with Gaussian peak profile (width 0.05 eV).

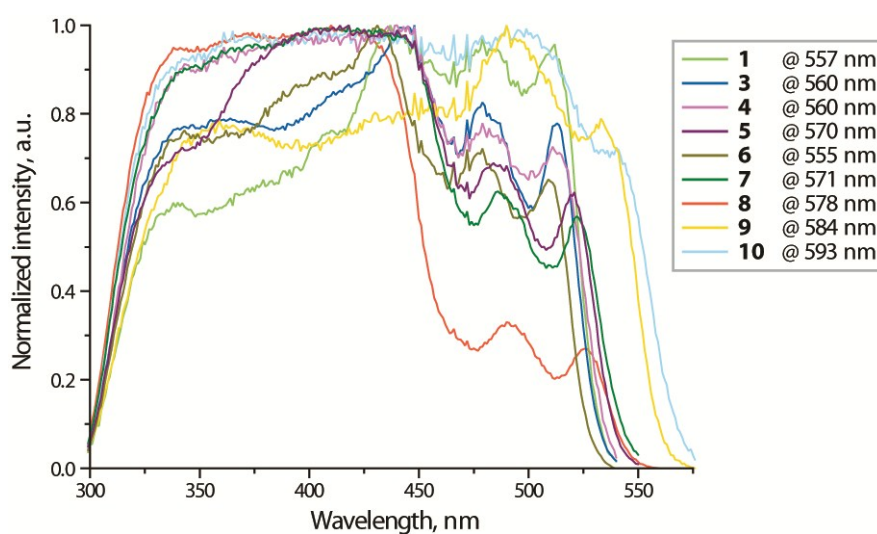

**Figure S6.** Normalized solid state excitation spectra of complexes 1, 3–10, 298 K.

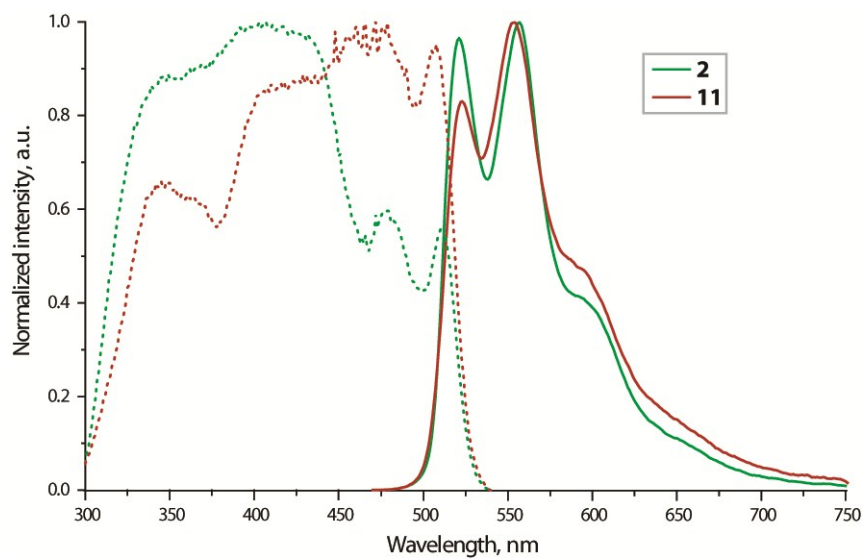

**Figure S7.** Normalized solid state excitation (dotted lines) and emission (solid lines) spectra of complexes **2** and **11**, 298 K.

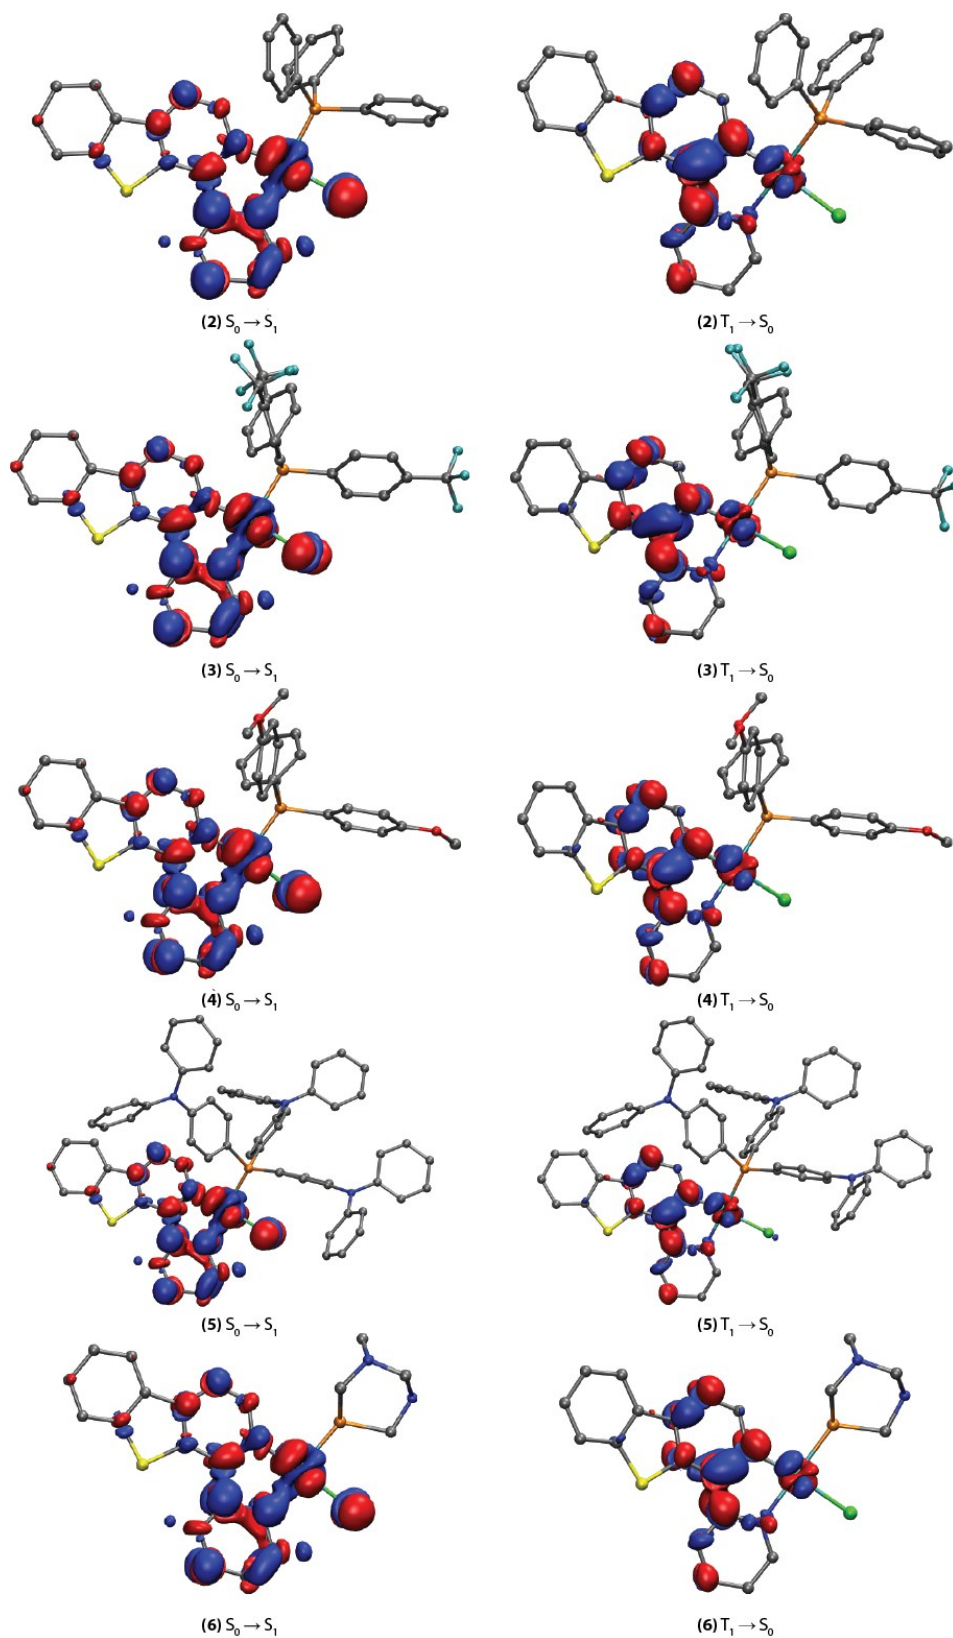

**Figure S8.** Electron density difference plots for the lowest energy singlet excitation ( $S_0 \rightarrow S_1$ ) and the lowest energy triplet emission ( $T_1 \rightarrow S_0$ ) of the complexes **2–6** (isovalue 0.002 a.u.). During the electronic transition, the electron density increases in the blue areas and decreases in the red areas. Hydrogen atoms are omitted for clarity.

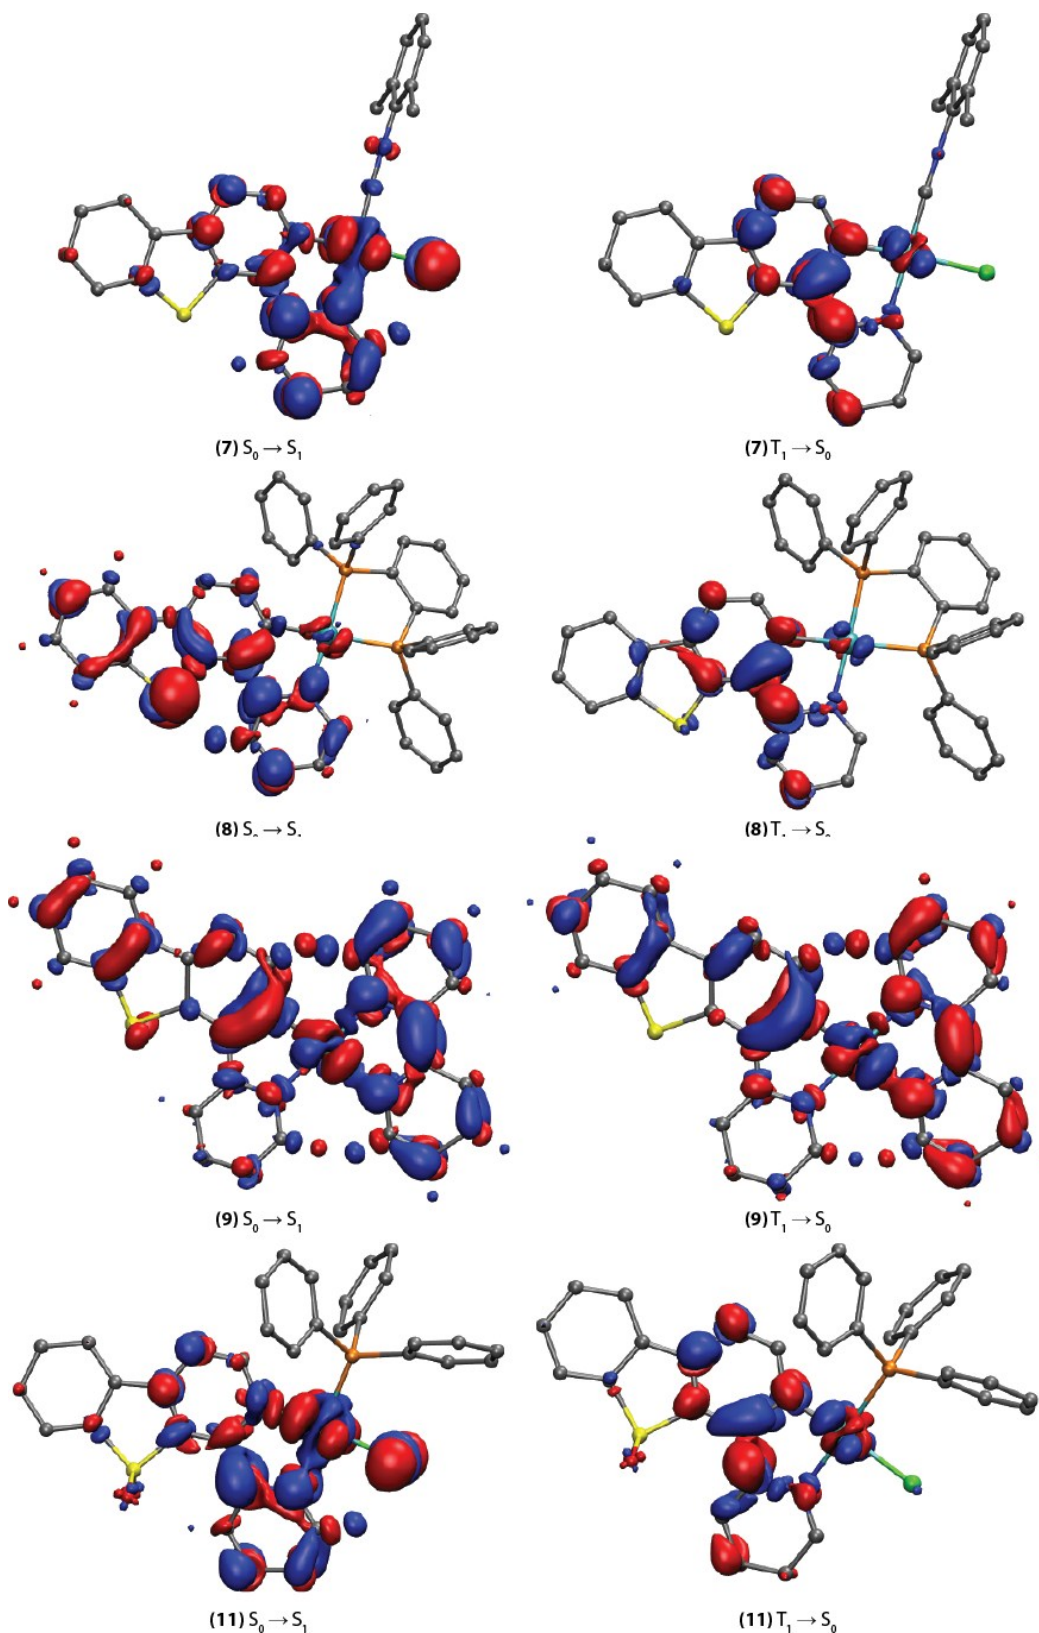

**Figure S9.** Electron density difference plots for the lowest energy singlet excitation ( $S_0 \rightarrow S_1$ ) and the lowest energy triplet emission ( $T_1 \rightarrow S_0$ ) of the complexes 7–9 and 11 (isovalue 0.002 a.u.). During the electronic transition, the electron density increases in the blue areas and decreases in the red areas. Hydrogen atoms are omitted for clarity.
